# Supplementary material for: Expression of the First Recombinant Anti-Tumoral Snake Venom Kunitz-Type Serine Protease Inhibitor
Source: MDPI journal article supplement (doi:10.3390/toxins14030170), 2022-02-25
Supplement: s1 [file s1]

Article

# Expression of the First Recombinant Anti-Tumoral Snake Venom Kunitz-Type Serine Protease Inhibitor

Maram Morjen, Wassim Moslah, Imen Touihri-Baraketi, Najet Srairi-Abid, José Luis, Naziha Marrakchi, and Jed Jebali

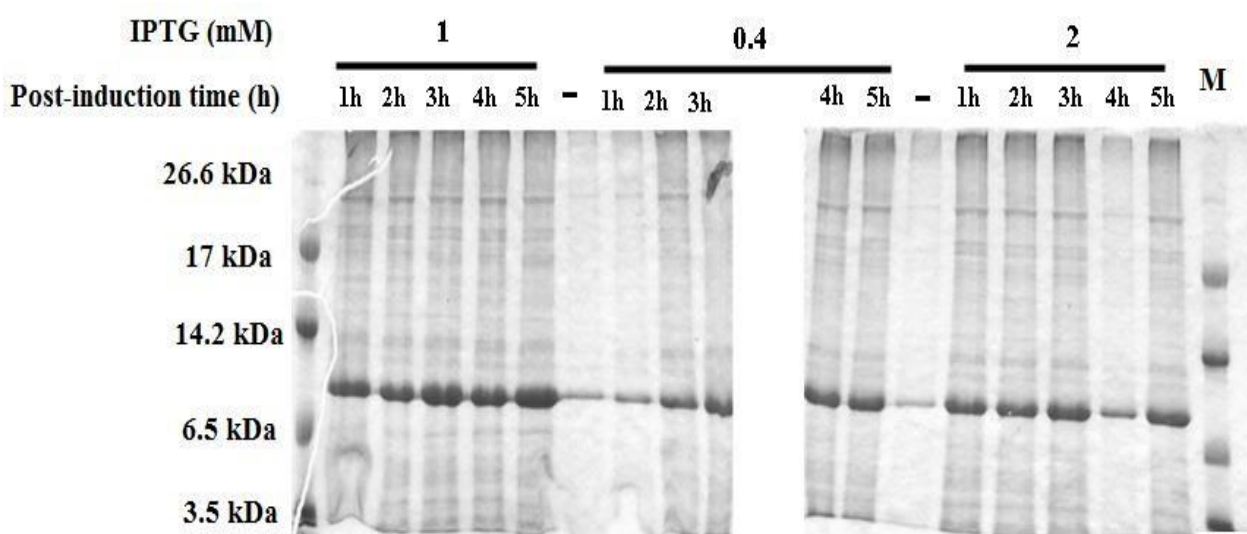

**Figure S1.** Optimization of rPIVL expression: Samples from different culture steps were separated by SDS-PAGE. Performed parameters of expression were carried out, such as the IPTG concentrations (0.4, 1 and 2 mM) and post-induction time (1 h-5 h). Lane M: Ultra low Protein marker; - : control, non-induced culture.

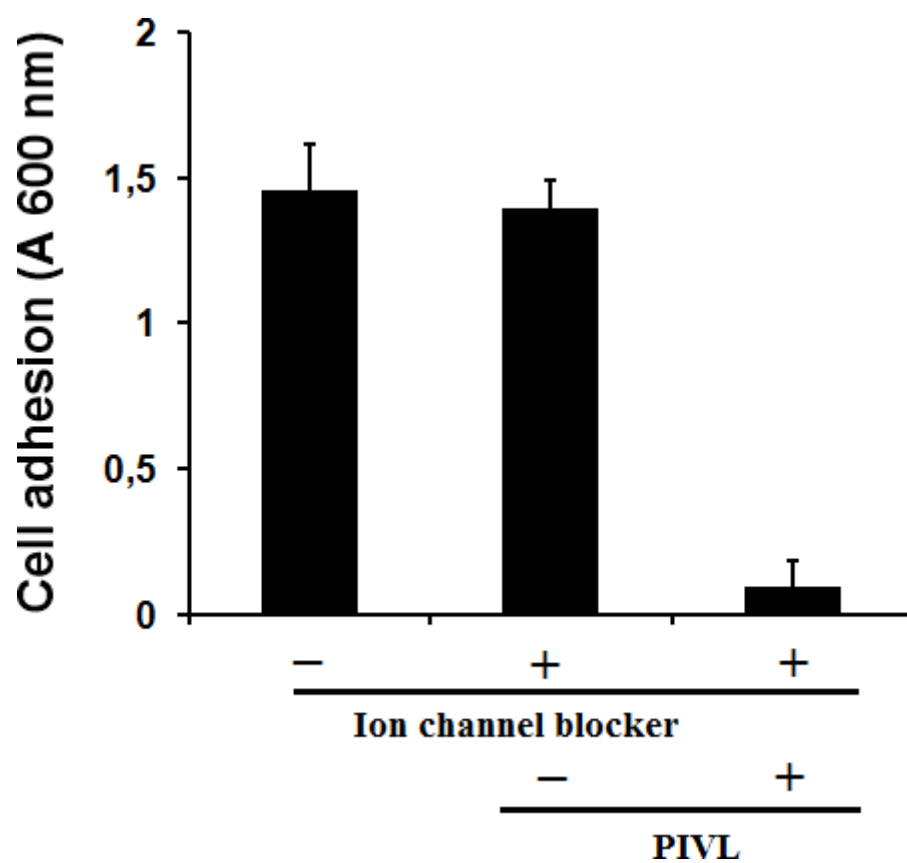

**Figure S2.** Effect of PIVL on U87 cells incubated with ion channel blocker: Cells were seeded and incubated with tetraethylammonium (TEA). Adhesion cells were performed in presence or in absence of nPIVL.
